# Supplementary material for: Systematic analysis of plant mitochondrial and chloroplast small RNAs suggests organelle-specific mRNA stabilization mechanisms
Source: PubMed Central journal article supplement — Nucleic Acids Res. 2016 May 27;44(15):7406–17. doi: 10.1093/nar/gkw466 (PMC5009733; doi:10.1093/nar/gkw466), 2016-05-27
Supplement: supp_gkw466_nar-03721-a-2015-File008.pdf [file supp_gkw466_nar-03721-a-2015-File008.pdf]

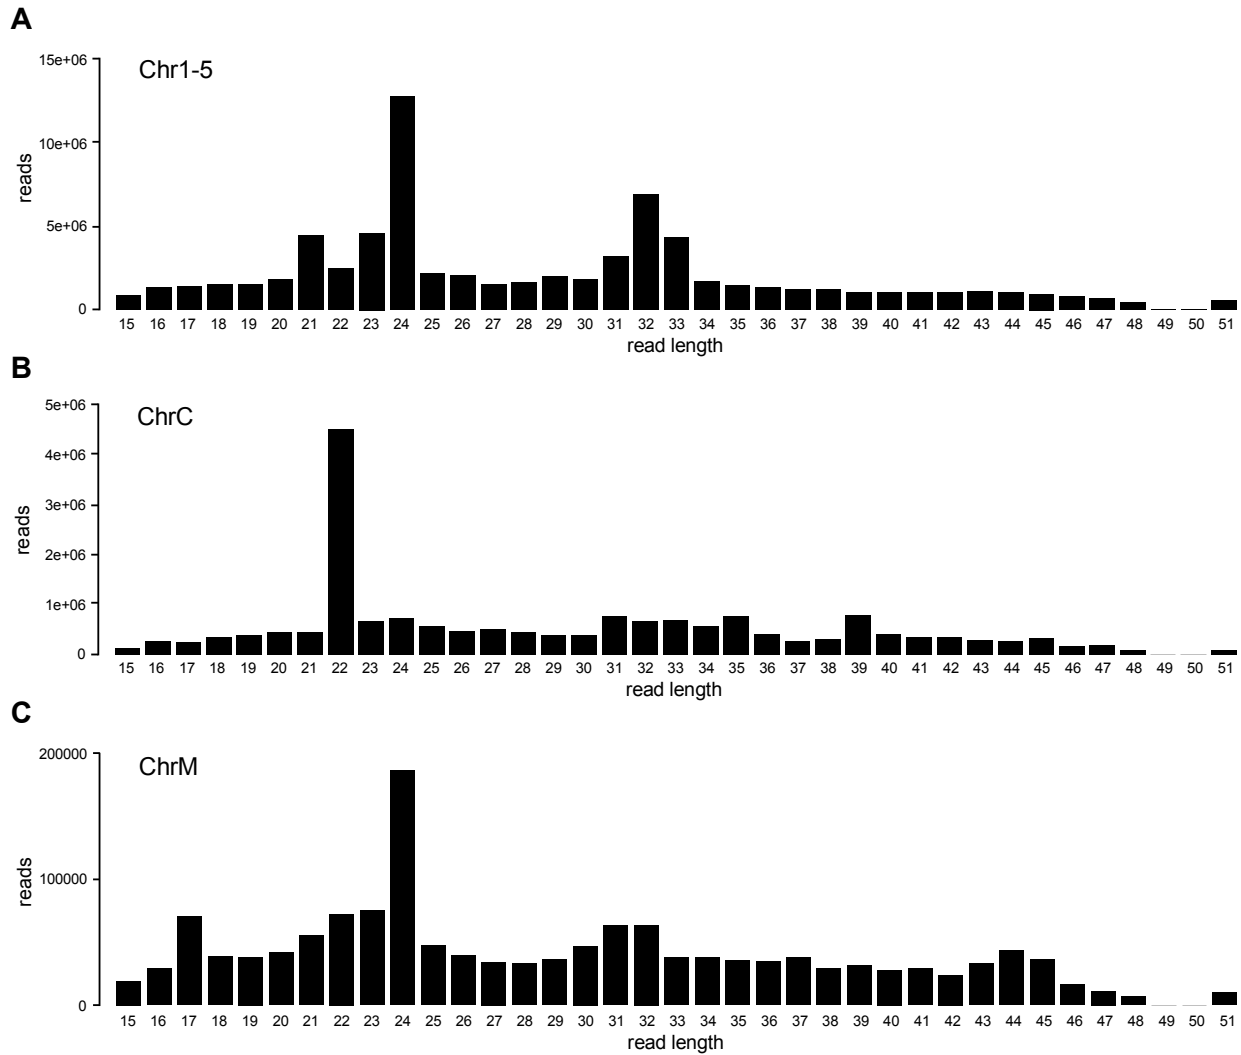

**Supplementary Figure S1: Read distribution of sRNAs that map to nuclear and organelle genomes.** sRNAs from eight different individual *Arabidopsis* Col-0 lines (20) were mapped using nuclear, mitochondrial, and plastid genomes as reference sequences (NCBI: JF729201, TAIR10; 22). Mapping was performed using bowtie (23), allowing for a maximum of two mismatches. The number of mapped reads is plotted against the length of the sRNA. sRNAs that map to the nuclear chromosomes (A), the plastid (B) and mitochondrial genome (C) are displayed.

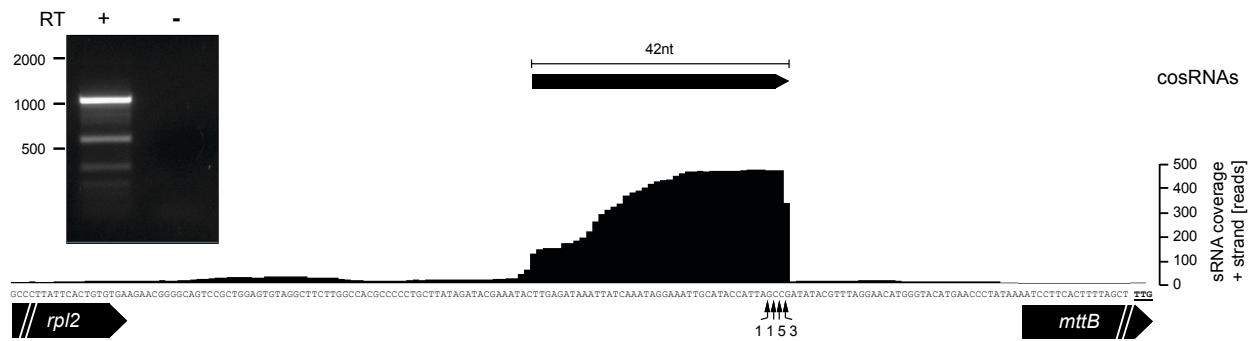

**Supplementary Figure 2: Identification of a monocistronic *rpl2* transcript.**

Total Arabidopsis RNA was ligated to a 3'-blocked DNA oligonucleotide selectively at the 3'-end, reverse-transcribed using an oligonucleotide-specific primer, and amplified by PCR using combinations of gene-specific and oligonucleotide-specific primers. The amplification products were separated on an agarose gel (left side). PCR products were gel-purified, cloned, and sequenced.

Amplification of a sample without reverse transcriptase (-RT) was included as a control for nonspecific amplification of DNA. The intergenic region between *rpl2* and *mttB* is shown, with arrows indicating TAIR10 annotations. The sRNA coverage is shown in black above the genome sequence. The sRNA identified is marked with an arrow. The number of 3'-ends obtained by cloning the 1-kb band is shown below the genome sequence. Only individual ligation events, as judged from analyses of the barcode included in the 3' adapter oligonucleotide, were counted.

The sequence of a potential alternative startcodon (67) is underlined.

**A**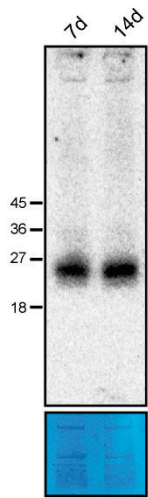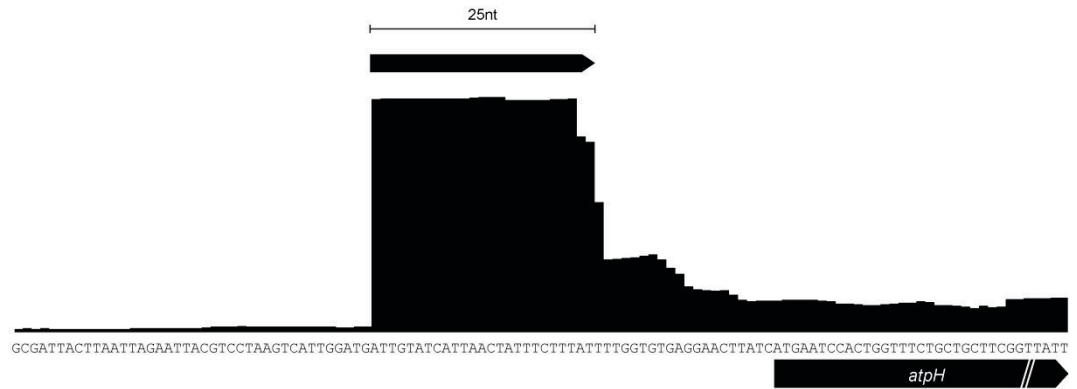**B**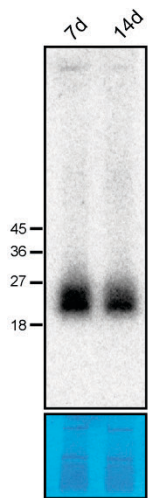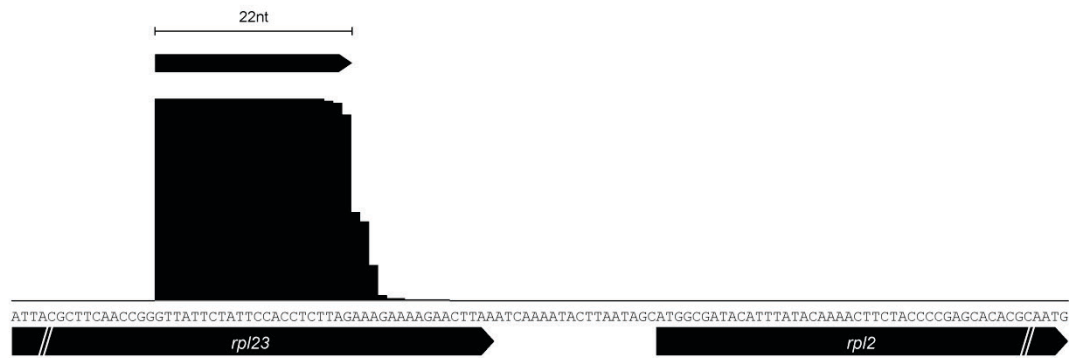**C**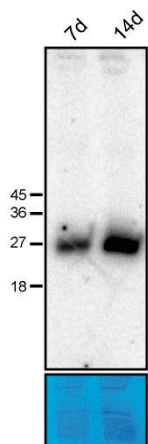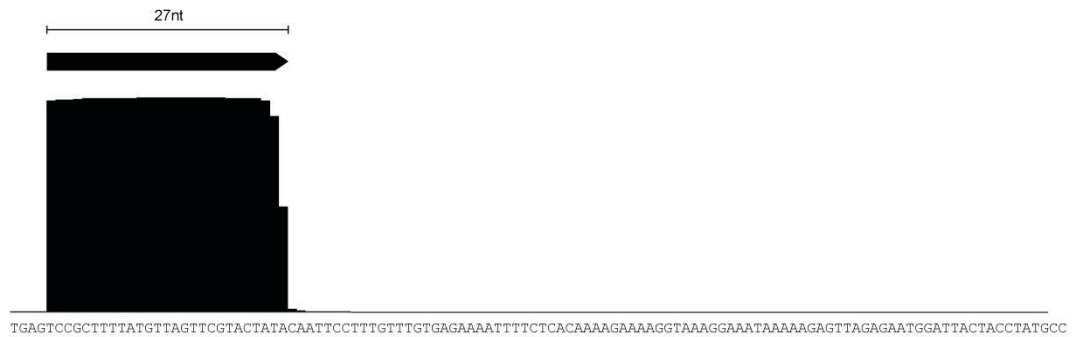

**Supplementary Figure S3: Detection of plastid cosRNAs by RNA gel blot analysis.** Total RNA (20 µg) from 7- and 14-day-old seedlings was separated on denaturing polyacrylamide gels, and three cosRNAs were detected using <sup>32</sup>P-end-labeled oligonucleotide probes after transfer to a nylon membrane. Sizes of marker oligonucleotides are indicated beside the radiograph. A methylene blue-stained membrane after transfer is shown as a loading control. The right side of each panel shows the location of the sRNA with respect to neighboring genes. The sRNA coverage is shown in black. The sizes of cosRNAs are shown above arrows, indicating the identified cosRNAs. Detection of the cosRNAs *atpH* 5' (A), *rpl2* 5' (B), and *ycf3* 5' (C). The cosRNA *atpH* 5' likely represents the footprint of the Arabidopsis homolog of maize PPR10.

**A**

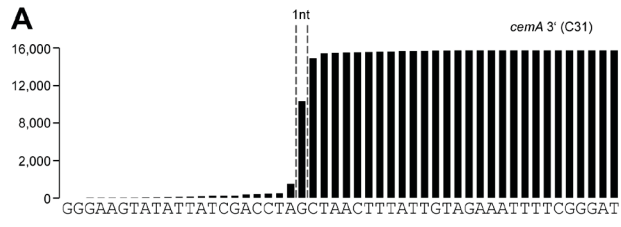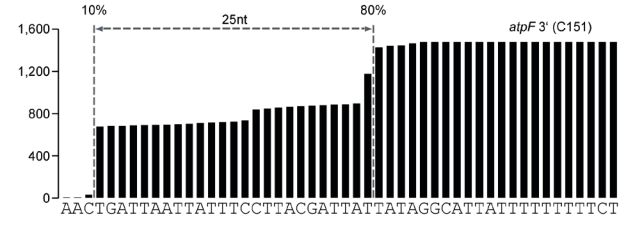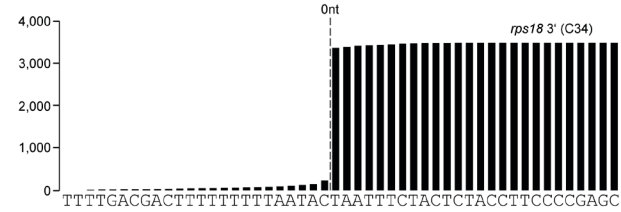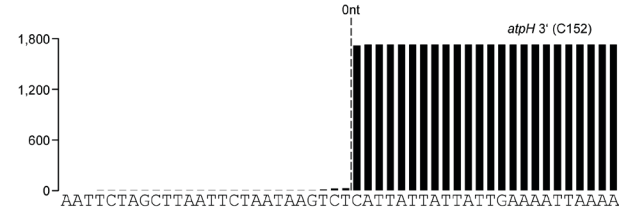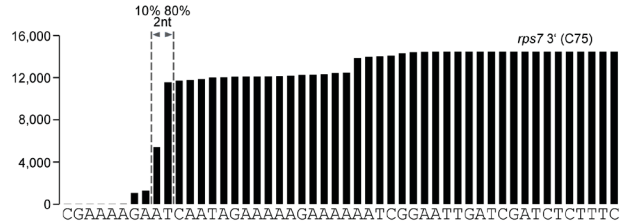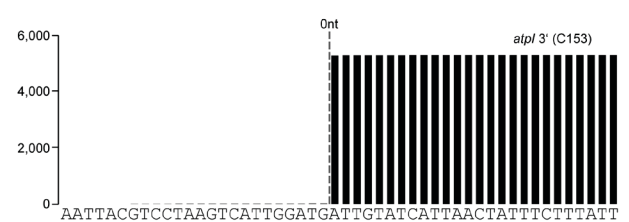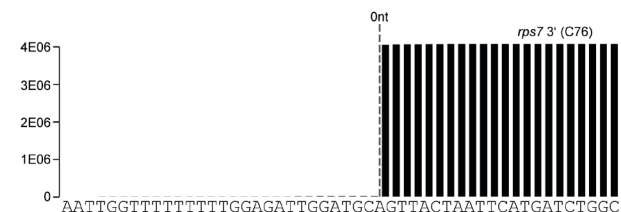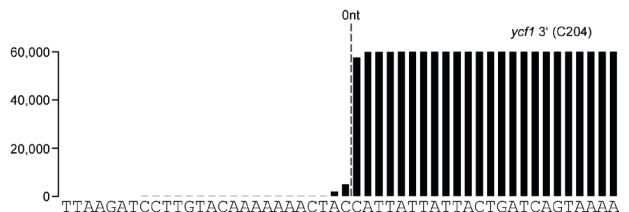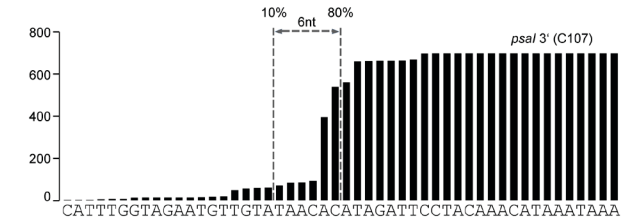

**B**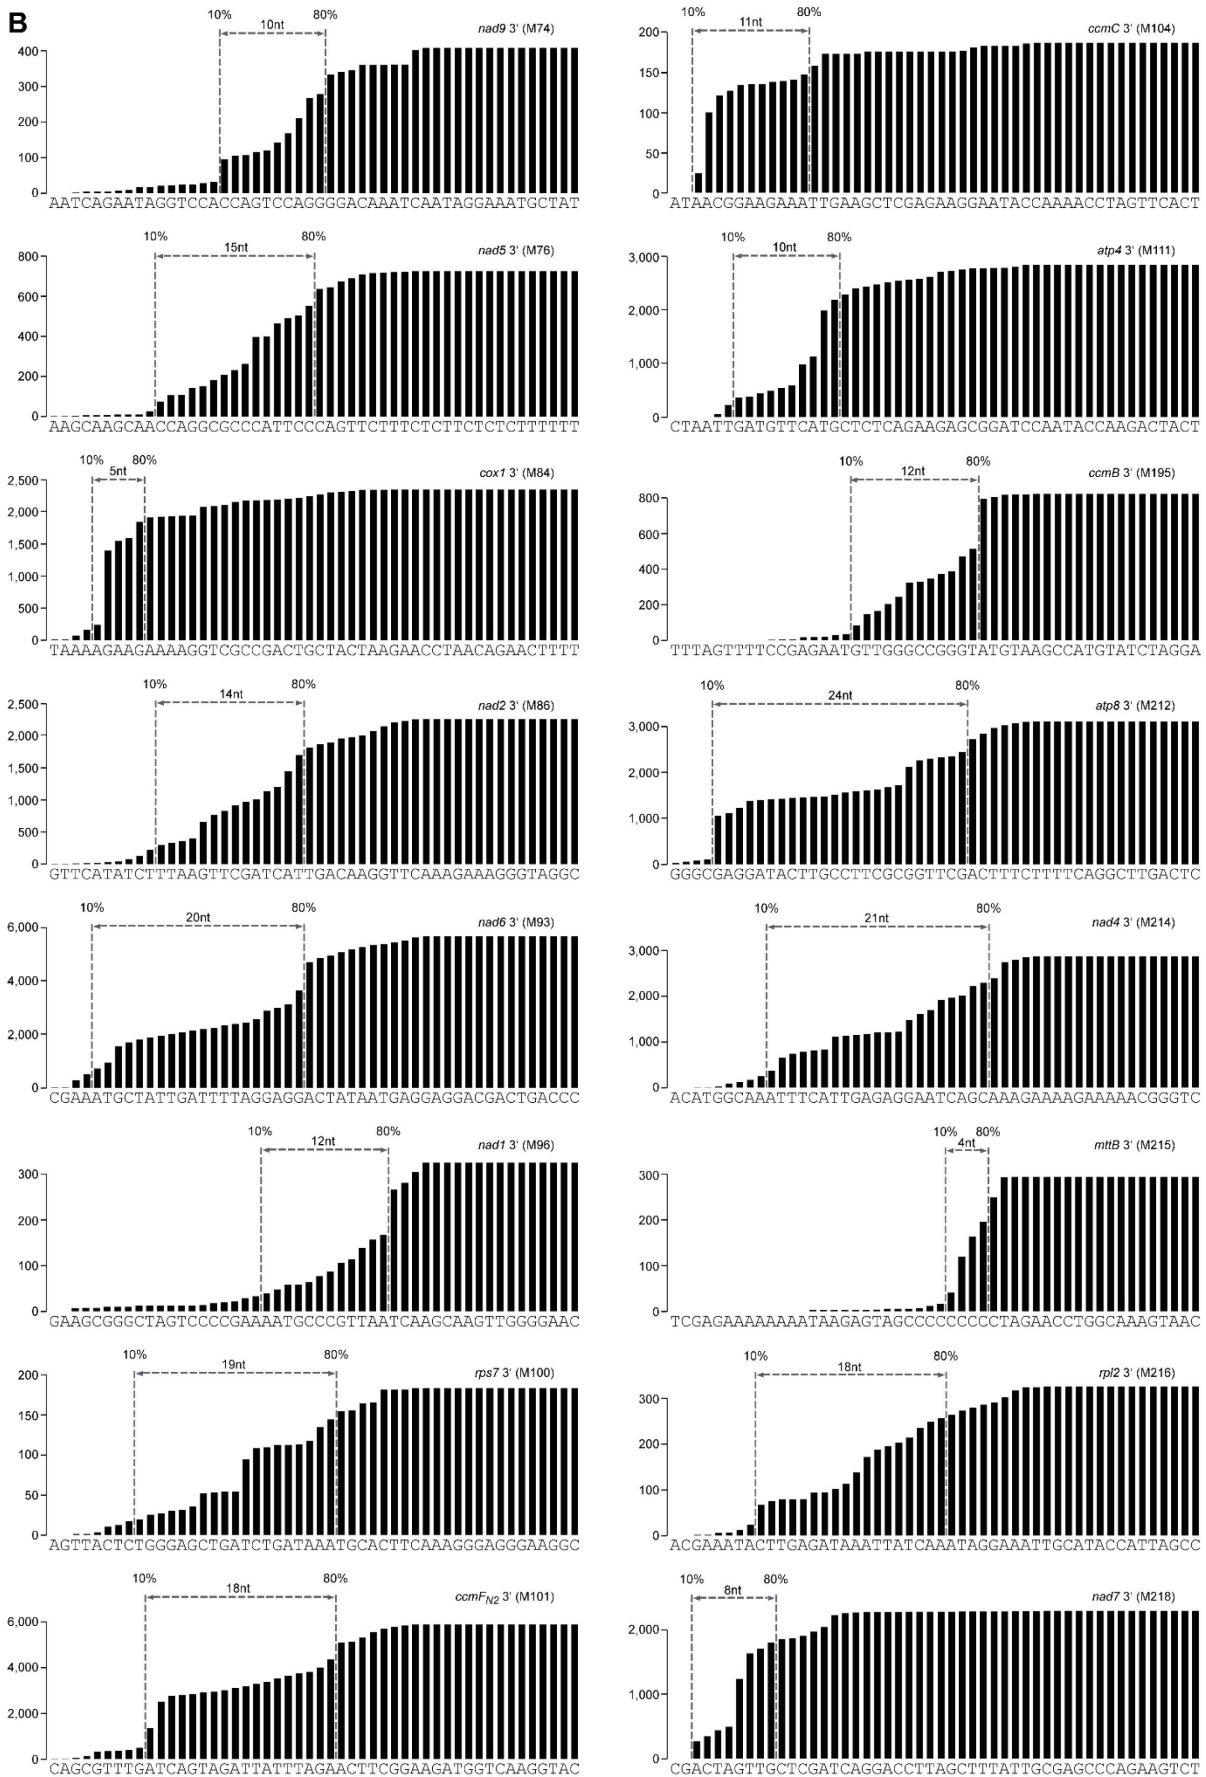

**Supplementary Figure S4: 5' Sharpness of cosRNAs overlapping transcript 3'-ends.** sRNA coverage at 3'-ends of chloroplast (A) and mitochondria (B) transcript ends mapped previously (13, 33, 46, 69). The coverage is shown in number of reads. Only alignments that end at the dominant 3'-end of the cosRNA are shown and used for the analysis of coverage decrease. The decrease in cosRNA coverage at the 5'-end was measured as the number of nucleotides needed to decrease maximal coverage from 80% to 10% (dashed lines).

**A**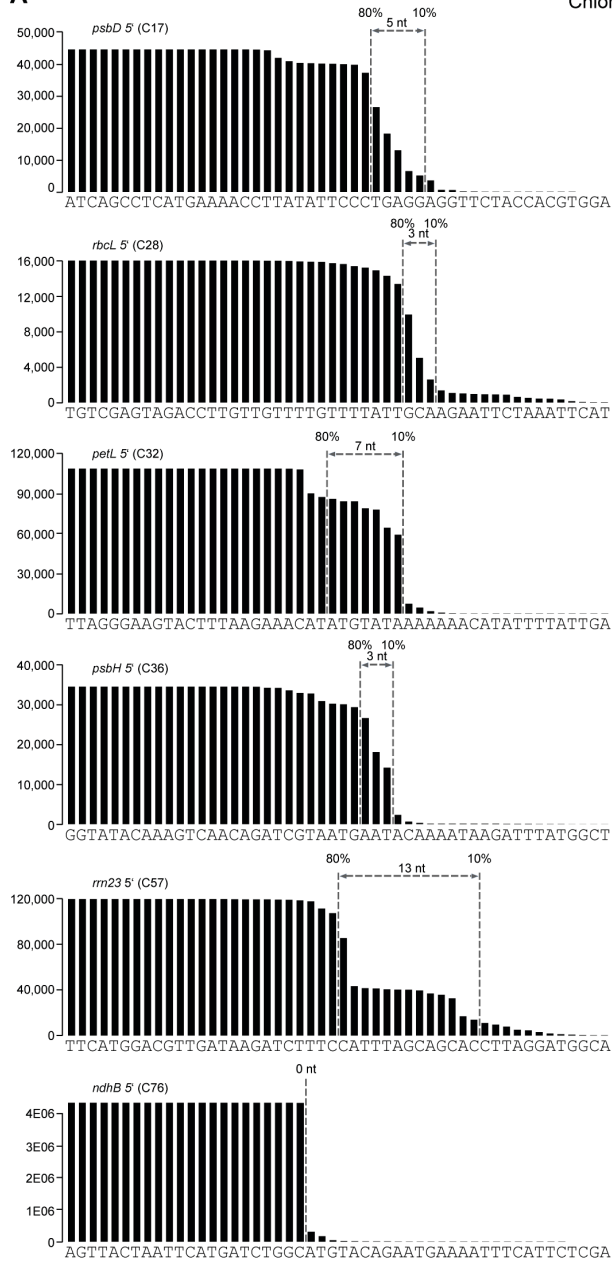**Chloroplast**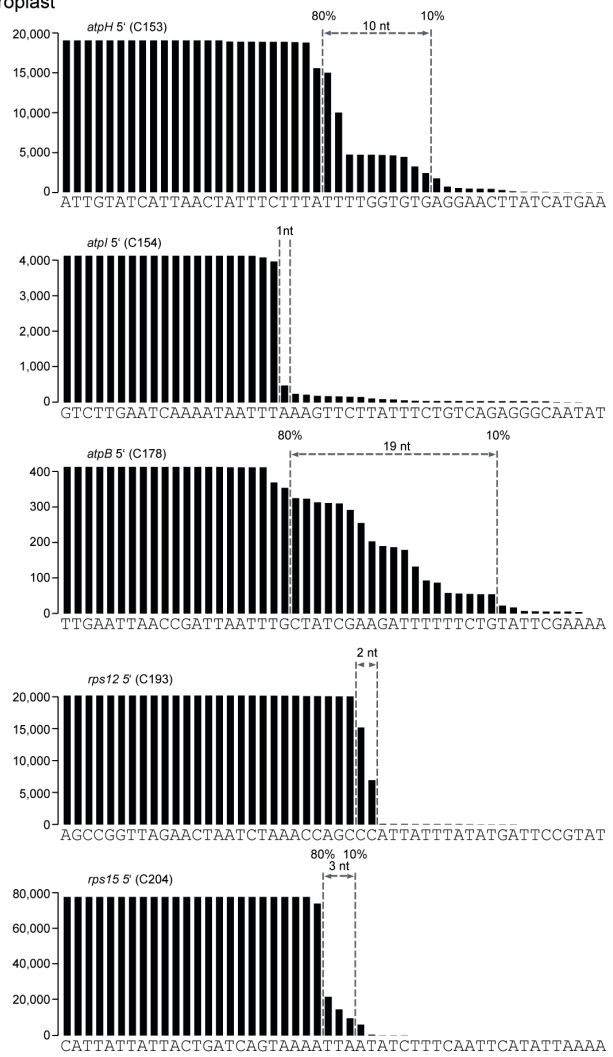**B**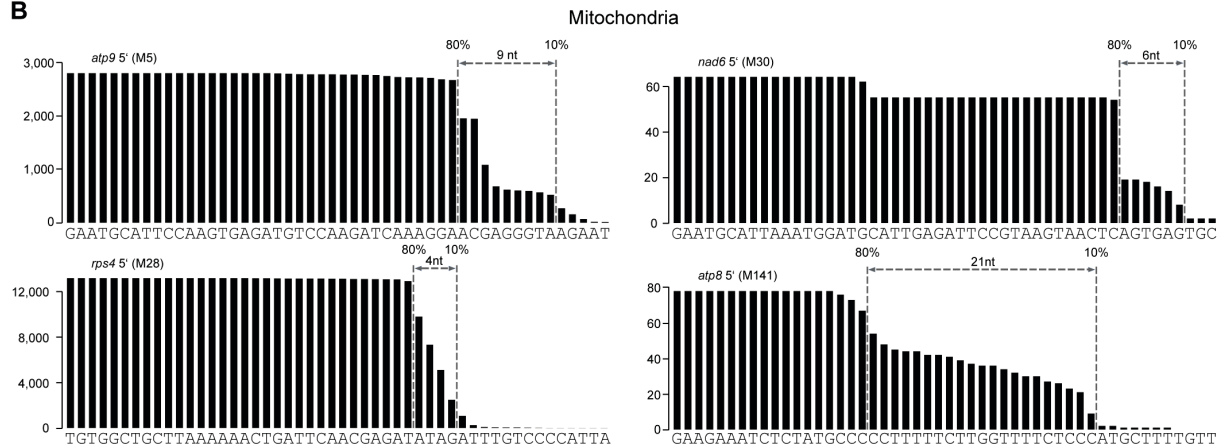



**Supplementary Figure S5: 3' Sharpness of cosRNAs overlapping transcript 5'-ends.** sRNA coverage at 5'-ends of chloroplast (A) and mitochondria (B) transcript ends mapped previously (13, 33, 46, 68–73). The coverage is shown in number of reads. Only alignments that start at the dominant 5'-end of the cosRNA are shown and used for the analysis of coverage decrease. The decrease in cosRNA coverage at the 3'-end was measured as the number of nucleotides needed to decrease maximal coverage from 80% to 10% (dashed lines).

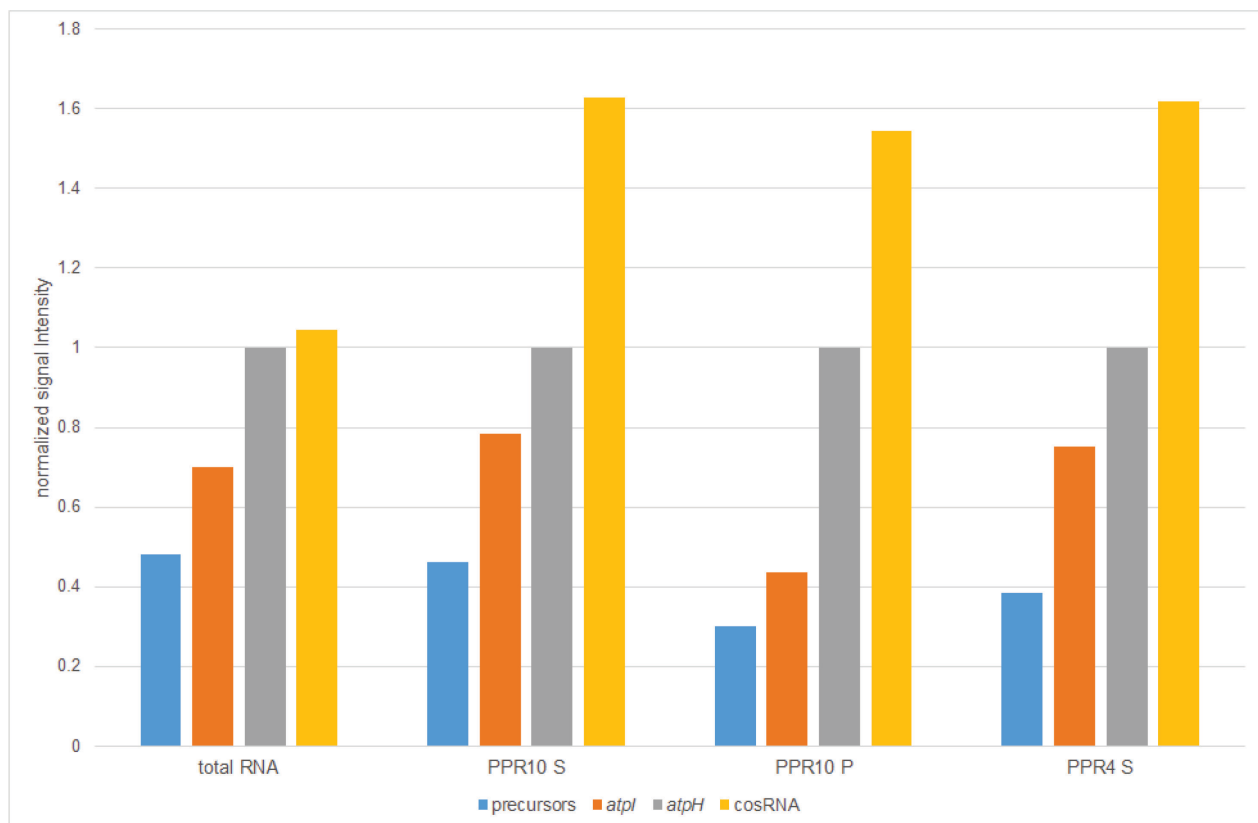

**Supplementary Figure S6:** Quantification of the bands in the RNase protection assay (Figure 5). Individual bands corresponding to polycistronic precursors, processed *atpI*, processed *atpH* and the cosRNA in the radiographs were quantified using ImageLab software (BioRad) and normalized to the signal for the processed *atpH* mRNAs. The values were adjusted for the content of radiolabeled Us. S stands for supernatant fractions of the immunoprecipitations, P for pellet fractions.
